# Supplementary material for: Overexpression of Nicotinamide N-methyltransferase mainly covers stroma of colorectal cancer and correlates with unfavorable survival by its product 1-MNA
Source: PubMed Central journal article supplement (PMC8425209; doi:10.7150/jca.56419), 2021-08-26
Supplement: jcav12p6170s1.pdf [file jcav12p6170s1.pdf]

Supplement Figure S1

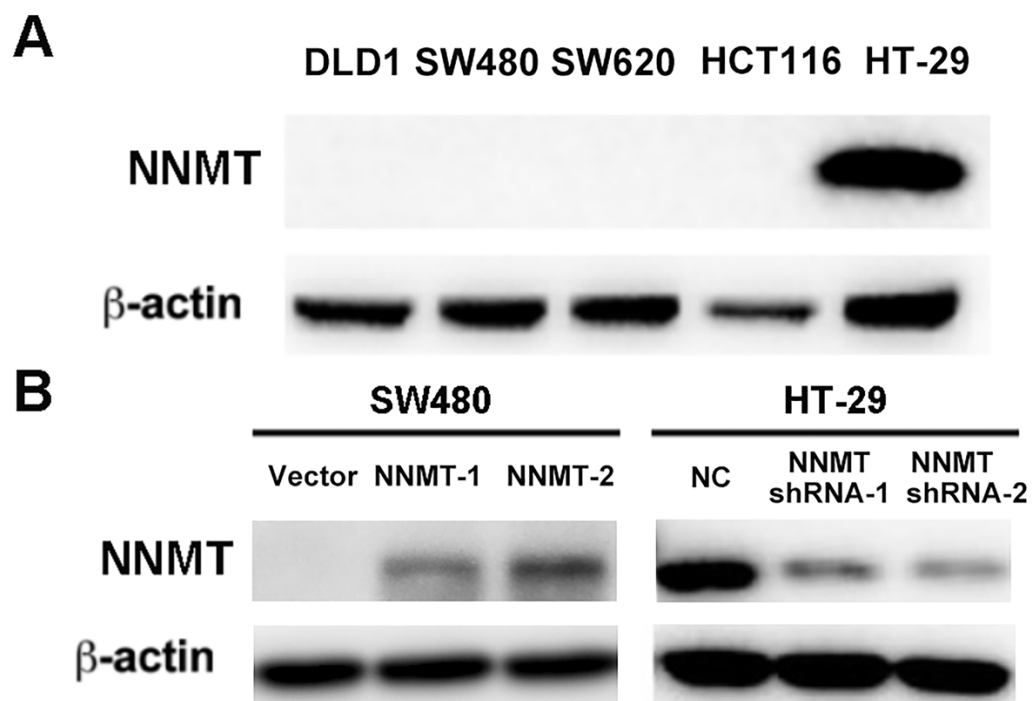

**Figure S1. Expression of NNMT in different CRC cell lines and the cell models of NNMT overexpression and downregulation.** (A) Western blot was used to analyze the NNMT protein expression levels in five CRC cell lines.  $\beta$ -actin was used as the internal control. High protein expression level of NNMT was detected in HT-29, while DLD1, SW480, SW620 and HCT116 cells showed no NNMT expression. (B) Western blot was used to analyze the NNMT expression in SW480 cell model with NNMT overexpression and HT-29 cell model with NNMT downregulation. These are the representative results of at least three independent experiments.  $\beta$ -actin was used as an internal control.
